# Supplementary material for: Metabolomic profiling of human bladder tissue extracts
Source: Research Square preprint supplement (doi:10.21203/rs.3.rs-2985696/v1), 2023-05-30
Supplement: Supplementary file 1 [file c66f5d51249e6c4f2134894d.docx]

Supplementary material

Research Article

**Metabolomic profiling of human bladder tissue extracts**

Krzysztof Ossolińskia, Tomasz Rumanb**,** Valérie Copiéc, Brian P. Tripetc, Artur Kołodziejb, Aneta Płazab, Anna Ossolińskaa, Tadeusz Ossolińskia, Anna Nieczajb, Joanna Niziołb*

a*Department of Urology, John Paul II Hospital, Grunwaldzka 4 St., 36-100 Kolbuszowa, Poland*

*bRzeszów University of Technology, Faculty of Chemistry, 6 Powstańców Warszawy Ave., 35-959 Rzeszów, Poland*

*cThe Department of Chemistry and Biochemistry, Montana State University, Bozeman, Montana 59717, United States*

*Corresponding author: Joanna Nizioł, e-mail: jniziol@prz.edu.pl, tel: (+48 17) 865-1310

**Table of contents**

**Table S1.** Clinical characteristic of bladder cancer patients **3**

**S1.** Preparation of tissue extracts for NMR and LDI-MS studies **3**

**S2.** NMR Spectra Acquisition and Preprocessing**4**

**S3.** NMR Data Analysis**4**

**S4.** LDI-MS Spectra Acquisition and Preprocessing **5**

**Table S2.** Mean metabolite concentrations (mM) for normal vs. bladder cancer tissue extracts in 1H NMR training set **7**

**Table S3.** Mean metabolite concentrations (mM) for normal vs. bladder cancer tissue extracts in 1H NMR in validation set**9**

**Table S4.** Validation of the models with a sevenfold cross-validation method and permutation tests **12**

**Fig. S1.** Analysis of tissue metabolite profiles created for 1H NMR data for distinction of cancer and normal tissue from BC patients in the validation set**13**

**Fig. S2.** Analysis of tissue metabolite profiles created for 1H NMR data for distinction different grades of bladder cancer and normal tissue samples in validation set**14**

**Fig. S3.** Analysis of tissue metabolite profiles created for 1H NMR data for distinction of pTa stage of bladder cancer and normal tissue samples in validation set**15**

**Fig. S4.** Classification of bladder cancer and normal tissue samples using tissue metabolite profiles obtained from PFL-2D GS LASiS 109AgNPs LDI-MS data on polar tissue extracts **16**

**Fig. S5.** Classification of bladder cancer and normal tissue samples using tissue metabolite profiles obtained from PFL-2D GS LASiS 109AgNPs LDI-MS data on non-polar tissue extracts **17**

**Table S5.** Summary of the subsets of potential biomarkers of bladder cancer from silver-109-based LDI-MS spectral analyses of tissue samples **18**

**Table S6.** Result from Pathway Analysis**20**

**Table S7.** Result from Enrichment Pathway Analysis **21**

**Table S1.** Summary of clinical characteristics of bladder cancer patients

| **Characterisics** | **Bladder cancer patients** |
| --- | --- |
| **No. of subjects** | 99 |
| **Age (mean/SD)** | 72/10 |
| **Gender** |  |
| Female | 20 |
| Male | 79 |
| **Gradea** |  |
| High grade | 39 |
| Low grade | 55 |
| LG (70%) and HG (30%) | 1 |
| LG (85%) and HG (15%) | 1 |
| PUNLMP | 3 |
| **Stage** |  |
| pT1 | 18 |
| pT2 | 10 |
| pTa | 70 |

*a* Tumors were classified according World Health Organization (WHO)/International Society of Urological Pathology (ISUP) classification criteria; LG – low-grade; HG – high-grade; PUNLMP - papillary urothelial neoplasm of low malignant potential; pT1 and pTa – high risk non-muscle invasive bladder cancer; pT2 – muscle invasive bladder cancer; pT- the stage has been based on pathological or microscopic findings; SD: standard deviation.

**S1. Preparation of tissue extracts for NMR and LDI-MS studies**

A weighted amount (0.3–19 mg) of sectioned tissue was transferred to a 2 ml centrifuge tube, then 1:2 MeOH/CHCl3 (1:2, v/v) solution (normalized to tissue weight) was added and homogenized with glass beads for 60 s. Next, a cold H2O (normalized to tissue weight) was added to each tube and then again homogenized two times for 60 s with a 5-min break time. The samples were placed at − 20 °C for 20 min. and then centrifuged at 14,000 × g for 10 min at 4 °C to remove cells and other precipitated material. The polar (upper) phase was transferred to new 1.5 ml microcentrifuge tube, similarly non-polar (lower) phase was transferred to new 1.5 ml microcentrifuge tube. Finally, from all resulting samples, 50 μl volumes were taken and used for 109AgNPs-LDI-MS analyses. All sample was lyophilized to complete dryness using a SpeedVac vacuum concentrator (ca. 1 mbar), with no heat.

**S2. NMR Spectra Acquisition and Preprocessing**

Dried material was re-suspended in 600 μL of NMR buffer consisting of 25 mM NaH2PO4/Na2HPO4, 0.4 mM imidazole, 0.25 mM 4,4-dimethyl-4-silapentane-1-sulfonic acid (DSS) in 90% H2O/10% D2O, pH 7.0. Following re-suspension, samples were centrifuged at 21,000 rpm for 1 min to pellet insoluble debris, and then transferred to 5 mm NMR tubes for NMR metabolomics analysis. 1D 1H NMR spectra were collected at 298 K (25°C) using a Bruker 600 MHz (1H Larmor frequency) AVANCE III solution NMR spectrometer, equipped with a SampleJet automatic sample loading system, a 5 mm triple resonance (1H, 15N, 13C), liquid-helium-cooled TCI NMR cryoprobe, and Topspin software (Bruker version 3.6). 1D 1H NMR spectra acquisition was performed using the Bruker-supplied excitation sculpting (ES)-based ‘zgesgp’ pulse sequence, and NMR spectra were recorded with 256 scans and a 1H spectral window of 7211.538 Hz. Free induction decays (FIDs) were collected with 64K data points and a dwell time interval of 69.33 µsec, amounting to a data acquisition time of 4.54 s. Relaxation delay (D1) times between acquisitions were set to 2 s, resulting in an overall 6.5 s delay between scans. DSS chemical shift referencing and phase correction of 1D 1H NMR spectra were conducted using Topspin software (Bruker version 3.6).

For verification of Chenomx-annotated metabolites, 2D 1H-1H total correlation spectroscopy (TOCSY) spectra were acquired for representative samples using the Bruker-supplied ‘mlevphpr.2/mlevgpph19’ pulse sequences (256 × 2048 data points, 2 s relaxation delay, 32 transients per FID, 1H spectral window of 6602.11 Hz, 80 ms TOCSY spin lock mixing period). 2D 1H-1H TOCSY spectra were processed using the Topspin software (Bruker version 3.6).

**S3. NMR Data Analysis**

Further processing of 1D 1H NMR spectra and metabolite profiling analyses were conducted using the Chenomx NMR Suite software (version 8.1; Chenomx Inc., Edmonton, Alberta, Canada). Baseline correction of NMR spectra following import of preprocessed ‘1r’ NMR spectral files into Chenomx software was performed using the automatic cubic spline function in Chenomx, and subsequent manual breakpoint adjustment to obtain a flat, well-defined baseline, following recommendations from Chenomx application notes and previously reported methods [31]. 1H chemical shifts were referenced to the 0.0 ppm DSS signal, and the 1H NMR signals arising from imidazole were used to correct for small chemical shift changes due to slight variations in sample pH. Metabolite identification and quantification were performed by fitting the 1D 1H spectral splitting patterns, chemical shifts, and spectral intensities to reference spectral patterns of small molecules using the Chenomx small molecule spectral database for 600 MHz (1H Larmor frequency) magnetic field strength NMR, and manually peak-based fits, where adjustments were made to achieve optimal spectral pattern fits for compound peak cluster location and intensity. An internal (0.25 mM DSS) standard was used for metabolite quantitation. Although pulse sequences utilizing the “ZGESGP” pulse sequence scheme suppress proton signals around the water region to a greater extent than the NOESYPR pulse sequence (i.e. 1D NOESY with presaturation during relaxation and mixing time), the relative intensities observed for these particular 1H signals whose resonance frequencies are close to that of the water 1H are largely identical to those seen using the noesypr1d sequence. To adjust for minor differences between 1D 1H spectra acquired using ‘zgesgp’ versus ‘noesypr1d’ pulse sequences, we have created our own in-house ‘zgesgp’-acquired 600 MHz metabolite library using pure standards and the ‘Compound Builder’ module of Chenomx NMR Suite program (version 8.1), as described previously in the operational manual.

**S4. LDI-MS Spectra Acquisition and Preprocessing**

Laser desorption ionization mass spectrometry imaging (LDI-MSI) experiments were performed using a Bruker Autoflex Speed time-of-flight mass spectrometer (resolution not lower than 20000 for *m/z* 1000) in positive-ion reflectron mode. The apparatus was equipped with a SmartBeam II 1000 Hz 355 nm laser, with a laser impulse energy of approximately 100−190 μJ, laser repetition rate of 1000 Hz, and deflection set on *m/z* lower than 80, with a *m/z* range of 80−2000 Da. Dry tissue extracts were diluted in mixture of H2O:methanol (1:1, v:v) 500 times. After that, 0.3 µl volumes were placed on stainless steel target using automatic pipeting and then covered by nebulization with silver-109 nanoparticle (109AgNP) suspension generated with pulsed fiber laser (PFL) 2D galvoscanner (2D GS) laser synthesis in solution/suspension (LASiS) and directly placed on steal target plates. Following solvent evaporation in air, the nebulization of 109AgNPs (later designated as 109AgNPs LDI-MS). Spectrum for each extract contained data from 20k laser shots with a default random walk applied (random points with 50 laser shots). All spectra were calibrated with the use of silver ions (109Ag+ to 109Ag10+). The first accelerating voltage was held at 19 kV, and the second ion source voltage was held at 16.7 kV. Reflector voltages used were 21 kV (the first) and 9.55 kV (the second). FlexAnalysis 4.0 software was used for data processing and analysis.

**Table S2.** Mean metabolite concentrations (mM) for normal vs. bladder cancer tissue extracts in 1H NMR training set.

| **TRAINING SET** | | | | | | | | | | | |
| --- | --- | --- | --- | --- | --- | --- | --- | --- | --- | --- | --- |
| **No.** | **Name** | **Normal (n=69)** | | **Cancer (n=69)** | | ***P*-valuea** | **FDR** | **FCb** | **VIP** | | **AUC** |
| **Mean** | **SD** | **Mean** | **SD** | **[t]** | **[ortho-t]** |
| 1 | 3-Hydroxybutyrate | 0.0103 | 0.0082 | 0.0056 | 0.0041 | 3.14E-05 | 6.74E-05 | 0.638 | 1.201 | 1.082 | 0.719 |
| 2 | Acetate | 0.0008 | 0.0048 | 0.0026 | 0.0781 | 8.79E-04 | 1.45E-03 | 2.692 | 1.024 | 0.659 | 0.611 |
| 3 | Alanine | 0.0473 | 0.0314 | 0.1102 | 0.0702 | 2.03E-07 | 8.72E-07 | 2.143 | 1.373 | 1.127 | 0.738 |
| 4 | Arginine | 0.0298 | 0.0222 | 0.0462 | 0.0315 | 4.62E-03 | 6.63E-03 | 1.743 | 0.438 | 1.034 | 0.599 |
| 5 | Asparagine | 0.0273 | 0.0247 | 0.0238 | 0.0286 | 9.73E-01 | 9.78E-01 | 1.237 | 0.341 | 0.801 | 0.526 |
| 6 | Aspartate | 0.0226 | 0.0166 | 0.0468 | 0.0323 | 5.88E-06 | 1.63E-05 | 2.570 | 1.113 | 1.058 | 0.716 |
| 7 | Betaine | 0.0023 | 0.0017 | 0.0024 | 0.0189 | 3.64E-01 | 4.12E-01 | 1.225 | 0.223 | 0.914 | 0.532 |
| 8 | Choline | 0.0146 | 0.0075 | 0.0285 | 0.0190 | 6.05E-06 | 1.63E-05 | 1.813 | 1.556 | 0.846 | 0.743 |
| 9 | Citrate | 0.0032 | 0.0036 | 0.0019 | 0.0245 | 7.61E-01 | 8.18E-01 | 1.080 | 0.176 | 0.565 | 0.542 |
| 10 | Creatine | 0.0209 | 0.0170 | 0.0325 | 0.0230 | 5.48E-03 | 7.61E-03 | 1.512 | 0.697 | 1.176 | 0.639 |
| 11 | Creatinine | 0.0066 | 0.0038 | 0.0083 | 0.0095 | 1.05E-01 | 1.29E-01 | 1.246 | 0.413 | 0.956 | 0.567 |
| 12 | Ethanolamine | 0.0107 | 0.0075 | 0.0186 | 0.0111 | 1.90E-07 | 8.72E-07 | 2.425 | 1.306 | 0.757 | 0.750 |
| 13 | Formate | 0.0010 | 0.0012 | 0.0012 | 0.0011 | 4.60E-02 | 6.00E-02 | 1.490 | 0.756 | 0.726 | 0.583 |
| 14 | Fumarate | 0.0003 | 0.0003 | 0.0002 | 0.0756 | 1.43E-01 | 1.71E-01 | 0.681 | 0.476 | 0.683 | 0.591 |
| 15 | Glucose | 0.0697 | 0.0416 | 0.0952 | 0.0782 | 9.78E-01 | 9.78E-01 | 0.969 | 0.036 | 1.170 | 0.538 |
| 16 | Glutamate | 0.0549 | 0.0308 | 0.1182 | 0.0634 | 7.96E-08 | 4.28E-07 | 2.132 | 1.226 | 1.047 | 0.780 |
| 17 | Glutamine | 0.0301 | 0.0175 | 0.0670 | 0.0366 | 3.62E-08 | 2.59E-07 | 2.296 | 1.586 | 0.948 | 0.800 |
| 18 | Glycerol | 0.0257 | 0.0123 | 0.0441 | 0.7096 | 2.29E-06 | 7.56E-06 | 1.618 | 1.081 | 1.102 | 0.710 |
| 19 | Glycine | 1.6005 | 0.8296 | 1.1595 | 0.7192 | 3.53E-03 | 5.23E-03 | 0.732 | 0.718 | 0.658 | 0.665 |
| 20 | Histidine | 0.0107 | 0.0084 | 0.0194 | 0.0143 | 2.73E-05 | 6.19E-05 | 2.026 | 0.935 | 1.152 | 0.660 |
| 21 | Hypoxanthine | 0.0122 | 0.0081 | 0.0234 | 0.0228 | 7.87E-09 | 1.13E-07 | 2.109 | 1.388 | 1.043 | 0.754 |
| 22 | Isoleucine | 0.0138 | 0.0099 | 0.0307 | 0.2363 | 3.39E-04 | 6.07E-04 | 1.690 | 0.810 | 1.233 | 0.652 |
| 23 | Lactate | 0.1041 | 0.0860 | 0.3855 | 0.2237 | 2.81E-10 | 1.21E-08 | 3.832 | 2.018 | 0.867 | 0.889 |
| 24 | Leucine | 0.0306 | 0.0229 | 0.0786 | 0.0641 | 3.79E-06 | 1.16E-05 | 1.992 | 1.002 | 1.220 | 0.688 |
| 25 | Lysine | 0.0564 | 0.0365 | 0.0769 | 0.0494 | 5.31E-02 | 6.72E-02 | 1.284 | 0.528 | 1.234 | 0.593 |
| 26 | Methionine | 0.0122 | 0.0100 | 0.0357 | 0.0322 | 4.07E-09 | 8.76E-08 | 3.695 | 1.371 | 1.109 | 0.734 |
| 27 | myo-Inositol | 0.0571 | 0.0378 | 0.0499 | 0.0301 | 1.82E-01 | 2.11E-01 | 0.879 | 0.360 | 1.224 | 0.562 |
| 28 | Phenylalanine | 0.0148 | 0.0122 | 0.0364 | 0.0411 | 5.47E-08 | 3.36E-07 | 3.032 | 1.121 | 1.185 | 0.699 |
| 29 | Proline | 0.0420 | 0.0267 | 0.0631 | 0.1171 | 2.81E-04 | 5.37E-04 | 1.854 | 0.916 | 1.056 | 0.624 |
| 30 | Propylene glycol | 0.0948 | 0.3383 | 0.0632 | 0.1153 | 9.08E-01 | 9.52E-01 | 0.959 | 0.128 | 0.352 | 0.502 |
| 31 | Pyroglutamate | 0.0138 | 0.0076 | 0.0178 | 0.0109 | 3.39E-03 | 5.21E-03 | 1.411 | 0.722 | 1.163 | 0.615 |
| 32 | Sarcosine | 0.0014 | 0.0014 | 0.0009 | 0.1494 | 1.06E-04 | 2.17E-04 | 0.682 | 0.759 | 0.835 | 0.714 |
| 33 | Serine | 0.0949 | 0.0590 | 0.2176 | 0.1342 | 1.30E-08 | 1.20E-07 | 2.625 | 1.305 | 1.001 | 0.753 |
| 34 | Taurine | 0.0384 | 0.0228 | 0.0484 | 0.0451 | 2.14E-02 | 2.88E-02 | 1.273 | 0.590 | 1.148 | 0.625 |
| 35 | Threonine | 0.0318 | 0.0206 | 0.0771 | 0.0547 | 1.40E-08 | 1.20E-07 | 3.246 | 1.289 | 0.885 | 0.751 |
| 36 | Trimethylamine | 0.0009 | 0.0009 | 0.0004 | 0.0046 | 2.97E-07 | 1.16E-06 | 0.567 | 1.437 | 0.927 | 0.767 |
| 37 | Tryptophan | 0.0031 | 0.0023 | 0.0060 | 0.0289 | 6.71E-04 | 1.15E-03 | 1.880 | 0.995 | 0.881 | 0.655 |
| 38 | Tyrosine | 0.0155 | 0.0113 | 0.0376 | 0.0281 | 2.59E-05 | 6.18E-05 | 2.071 | 1.087 | 1.124 | 0.684 |
| 39 | Uracil | 0.0068 | 0.0053 | 0.0108 | 0.0621 | 2.86E-03 | 4.55E-03 | 1.351 | 0.531 | 1.197 | 0.636 |
| 40 | Urea | 0.1135 | 0.0935 | 0.0945 | 0.0623 | 6.58E-01 | 7.25E-01 | 0.918 | 0.357 | 0.768 | 0.532 |
| 41 | Uridine | 0.0047 | 0.0035 | 0.0100 | 0.0366 | 2.87E-04 | 5.37E-04 | 1.756 | 1.141 | 0.774 | 0.678 |
| 42 | Valine | 0.0228 | 0.0168 | 0.0505 | 0.0358 | 1.42E-05 | 3.58E-05 | 1.852 | 0.958 | 1.227 | 0.680 |
| 43 | Xanthine | 0.0072 | 0.0055 | 0.0143 | 0.0286 | 1.17E-06 | 4.19E-06 | 1.854 | 1.053 | 1.140 | 0.692 |

a*P*-value determined from paired Student’s t-test; bfold change between cancer and normal tissue calculated from the concentration mean values for each group – cancer-to-normal ratio; AUC: area under the curve; FC: fold change; FDR: false discovery rate; SD: standard deviation; VIP: variable influence on projection

**Table S3.** Mean metabolite concentrations (mM) for normal vs. bladder cancer tissue extracts in 1H NMR in validation set.

| **VALIDATION SET** | | | | | | | | | | | |
| --- | --- | --- | --- | --- | --- | --- | --- | --- | --- | --- | --- |
| **No.** | **Name** | **Normal (n=30)** | | **Cancer (n=30)** | | ***P*-valuea** | **FDR** | **FCb** | **VIP** | | **AUC** | |
| **Mean** | **SD** | **Mean** | **SD** | **[t]** | **[ortho-t]** |
| 1 | 3-Hydroxybutyrate | 0.0278 | 0.0473 | 0.0102 | 0.0153 | 5.78E-03 | 9.55E-03 | 0.544 | 1.281 | 0.285 | 0.711 | |
| 2 | Acetate | 0.0004 | 0.0008 | 0.0023 | 0.0032 | 2.07E-02 | 2.87E-02 | 2.829 | 1.017 | 0.445 | 0.628 | |
| 3 | Alanine | 0.0611 | 0.0557 | 0.1222 | 0.0711 | 1.99E-06 | 2.14E-05 | 3.746 | 1.294 | 1.200 | 0.776 | |
| 4 | Arginine | 0.0322 | 0.0309 | 0.0522 | 0.0352 | 1.23E-04 | 3.31E-04 | 2.724 | 1.158 | 1.147 | 0.674 | |
| 5 | Asparagine | 0.0403 | 0.0455 | 0.0386 | 0.0575 | 5.43E-01 | 5.55E-01 | 1.088 | 0.195 | 0.726 | 0.601 | |
| 6 | Aspartate | 0.0272 | 0.0289 | 0.0588 | 0.0362 | 1.40E-05 | 6.67E-05 | 5.137 | 1.248 | 0.689 | 0.783 | |
| 7 | Betaine | 0.0021 | 0.0022 | 0.0030 | 0.0018 | 2.19E-03 | 3.92E-03 | 2.433 | 1.023 | 0.643 | 0.670 | |
| 8 | Choline | 0.0175 | 0.0118 | 0.0330 | 0.0231 | 1.46E-03 | 2.72E-03 | 2.846 | 1.134 | 1.058 | 0.706 | |
| 9 | Citrate | 0.0060 | 0.0069 | 0.0039 | 0.0062 | 8.80E-01 | 8.80E-01 | 0.989 | 0.347 | 0.122 | 0.571 | |
| 10 | Creatine | 0.0202 | 0.0216 | 0.0310 | 0.0225 | 8.72E-04 | 1.70E-03 | 2.713 | 0.868 | 0.759 | 0.682 | |
| 11 | Creatinine | 0.0086 | 0.0061 | 0.0088 | 0.0064 | 2.62E-01 | 2.89E-01 | 1.186 | 0.064 | 0.744 | 0.519 | |
| 12 | Ethanolamine | 0.0110 | 0.0092 | 0.0241 | 0.0201 | 2.56E-04 | 6.16E-04 | 3.480 | 1.408 | 0.790 | 0.730 | |
| 13 | Formate | 0.0018 | 0.0042 | 0.0013 | 0.0013 | 3.31E-01 | 3.55E-01 | 1.058 | 0.099 | 0.688 | 0.570 | |
| 14 | Fumarate | 0.0006 | 0.0012 | 0.0003 | 0.0004 | 3.68E-01 | 3.86E-01 | 0.696 | 0.271 | 1.231 | 0.572 | |
| 15 | Glucose | 0.0753 | 0.0586 | 0.1059 | 0.0755 | 1.14E-01 | 1.44E-01 | 1.484 | 0.616 | 1.230 | 0.606 | |
| 16 | Glutamate | 0.0634 | 0.0493 | 0.1336 | 0.0705 | 3.63E-05 | 1.20E-04 | 3.288 | 1.068 | 1.097 | 0.828 | |
| 17 | Glutamine | 0.0324 | 0.0229 | 0.0788 | 0.0451 | 3.24E-06 | 2.79E-05 | 3.806 | 1.351 | 1.046 | 0.842 | |
| 18 | Glycerol | 0.0304 | 0.0209 | 0.0504 | 0.0279 | 3.80E-04 | 8.40E-04 | 1.816 | 0.735 | 1.292 | 0.704 | |
| 19 | Glycine | 1.8795 | 1.5420 | 1.0815 | 0.6525 | 1.71E-01 | 1.93E-01 | 0.913 | 0.138 | 0.771 | 0.669 | |
| 20 | Histidine | 0.0136 | 0.0131 | 0.0211 | 0.0142 | 3.91E-04 | 8.40E-04 | 2.911 | 1.090 | 1.020 | 0.705 | |
| 21 | Hypoxanthine | 0.0114 | 0.0101 | 0.0262 | 0.0124 | 2.37E-05 | 9.25E-05 | 3.973 | 1.455 | 0.896 | 0.819 | |
| 22 | Isoleucine | 0.0161 | 0.0151 | 0.0346 | 0.0279 | 1.06E-05 | 5.70E-05 | 3.166 | 1.155 | 1.275 | 0.742 | |
| 23 | Lactate | 0.1127 | 0.1070 | 0.3939 | 0.2088 | 1.86E-08 | 8.01E-07 | 5.044 | 1.373 | 0.878 | 0.893 | |
| 24 | Leucine | 0.0369 | 0.0357 | 0.0891 | 0.0668 | 5.14E-06 | 3.69E-05 | 3.903 | 1.201 | 1.260 | 0.762 | |
| 25 | Lysine | 0.0682 | 0.0531 | 0.0893 | 0.0594 | 7.61E-03 | 1.13E-02 | 1.635 | 0.653 | 1.447 | 0.632 | |
| 26 | Methionine | 0.0129 | 0.0145 | 0.0396 | 0.0298 | 2.25E-05 | 9.25E-05 | 7.915 | 1.448 | 0.924 | 0.811 | |
| 27 | myo-Inositol | 0.0550 | 0.0471 | 0.0594 | 0.0351 | 1.52E-01 | 1.81E-01 | 1.933 | 0.892 | 1.007 | 0.566 | |
| 28 | Phenylalanine | 0.0182 | 0.0176 | 0.0414 | 0.0336 | 6.33E-05 | 1.81E-04 | 3.929 | 1.127 | 1.203 | 0.734 | |
| 29 | Proline | 0.0456 | 0.0385 | 0.0883 | 0.0785 | 5.59E-05 | 1.72E-04 | 2.858 | 1.061 | 1.273 | 0.693 | |
| 30 | Propylene glycol | 0.1580 | 0.3297 | 0.0240 | 0.0602 | 1.06E-01 | 1.39E-01 | 0.349 | 0.307 | 0.589 | 0.581 | |
| 31 | Pyroglutamate | 0.0148 | 0.0117 | 0.0219 | 0.0119 | 7.98E-04 | 1.63E-03 | 2.820 | 0.995 | 1.222 | 0.676 | |
| 32 | Sarcosine | 0.0030 | 0.0041 | 0.0011 | 0.0014 | 6.87E-03 | 1.09E-02 | 0.537 | 1.283 | 0.084 | 0.718 | |
| 33 | Serine | 0.1136 | 0.0819 | 0.2409 | 0.1427 | 1.42E-06 | 2.03E-05 | 3.378 | 1.097 | 1.174 | 0.766 | |
| 34 | Taurine | 0.0355 | 0.0272 | 0.0499 | 0.0231 | 8.14E-03 | 1.17E-02 | 2.830 | 1.226 | 0.669 | 0.660 | |
| 35 | Threonine | 0.0375 | 0.0269 | 0.0891 | 0.0563 | 6.91E-07 | 1.49E-05 | 3.528 | 1.190 | 1.189 | 0.799 | |
| 36 | Trimethylamine | 0.0023 | 0.0037 | 0.0008 | 0.0012 | 2.58E-04 | 6.16E-04 | 0.478 | 1.418 | 0.152 | 0.750 | |
| 37 | Tryptophan | 0.0050 | 0.0036 | 0.0072 | 0.0049 | 1.40E-01 | 1.72E-01 | 1.523 | 0.301 | 1.127 | 0.626 | |
| 38 | Tyrosine | 0.0191 | 0.0201 | 0.0398 | 0.0285 | 3.00E-05 | 1.08E-04 | 5.686 | 1.176 | 1.152 | 0.752 | |
| 39 | Uracil | 0.0086 | 0.0086 | 0.0129 | 0.0083 | 4.67E-02 | 6.27E-02 | 1.258 | 0.040 | 1.212 | 0.667 | |
| 40 | Urea | 0.1523 | 0.1371 | 0.0906 | 0.0640 | 1.71E-01 | 1.93E-01 | 0.739 | 0.570 | 1.089 | 0.618 | |
| 41 | Uridine | 0.0070 | 0.0053 | 0.0124 | 0.0080 | 7.61E-03 | 1.13E-02 | 1.999 | 0.481 | 1.103 | 0.718 | |
| 42 | Valine | 0.0282 | 0.0258 | 0.0590 | 0.0434 | 7.99E-06 | 4.91E-05 | 3.496 | 1.172 | 1.300 | 0.749 | |
| 43 | Xanthine | 0.0076 | 0.0059 | 0.0141 | 0.0084 | 3.22E-03 | 5.54E-03 | 1.884 | 0.761 | 1.212 | 0.734 | |

a*P*-value determined from paired Student’s t-test; bfold change between cancer and normal tissue calculated from the concentration mean values for each group – cancer-to-normal ratio; AUC: area under the curve; FC: fold change; FDR: false discovery rate; SD: standard deviation; VIP: variable influence on projection

**Table S4.** Validation of the models with a sevenfold cross-validation method and permutation tests

| **Model** | **Set** | **Component** | **R2(X)** | **R2(Y)** | **Q2(Y)** | **Permutation**  **(2000 iternations)** | |
| --- | --- | --- | --- | --- | --- | --- | --- |
| **R2(Y)** | **Q2(Y)** |
| Cancer vs. Control  (NMR data) | Training | P1 (Predictive) | 0.124 | 0.219 | 0.201 | 0.536 | 0.682 |
| O1 (Orthogonal in X) | 0.383 | 0.301 | 0.242 |
| Validation | P1 (Predictive) | 0.260 | 0.248 | 0.214 | 0.287 | 0.466 |
| O1 (Orthogonal in X) | 0.338 | 0.218 | 0.074 |
| HG vs. Control  (NMR data) | Training | P1 (Predictive) | 0.080 | 0.197 | 0.144 | 0.420 | 0.732 |
| O1 (Orthogonal in X) | 0.425 | 0.271 | 0.170 |
| Validation | P1 (Predictive) | 0.233 | 0.250 | 0.201 | 0.277 | 0.537 |
| O1 (Orthogonal in X) | 0.381 | 0.287 | 0.076 |
| LG vs. Control  (NMR data) | Training | P1 (Predictive) | 0.161 | 0.285 | 0.255 | 0.985 | 0.943 |
| O1 (Orthogonal in X) | 0.348 | 0.292 | 0.206 |
| Validation | P1 (Predictive) | 0.179 | 0.759 | 0.718 | 0.517 | 0.746 |
| O1 (Orthogonal in X) | 0.173 | 0.171 | 0.165 |
| pTa vs. Control  (NMR data) | Training | P1 (Predictive) | 0.180 | 0.291 | 0.262 | 0.541 | 0.685 |
| O1 (Orthogonal in X) | 0.356 | 0.305 | 0.250 |
| Validation | P1 (Predictive) | 0.198 | 0.317 | 0.278 | 0.536 | 0.770 |
| O1 (Orthogonal in X) | 0.353 | 0.313 | 0.219 |
| pT1 vs. Control  (NMR data) | All set | P1 (Predictive) | 0.073 | 0.216 | 0.150 | 0.240 | 0.818 |
| O1 (Orthogonal in X) | 0.416 | 0.269 | -0.047 |
| Cancer vs. Control  (LDI-MS data  polar phase) | Training | P1 (Predictive) | 0.084 | 0.424 | 0.393 | 0.872 | 0.964 |
| O1 (Orthogonal in X) | 0.236 | 0.283 | 0.243 |
| Validation | P1 (Predictive) | 0.096 | 0.468 | 0.399 | 0.807 | 0.983 |
| O1 (Orthogonal in X) | 0.261 | 0.239 | 0.170 |
| Cancer vs. Control  (LDI-MS data  non-polar phase) | Training | P1 (Predictive) | 0.070 | 0.218 | 0.183 | 0.773 | 0.898 |
| O1 (Orthogonal in X) | 0.348 | 0.519 | 0.429 |
| Validation | P1 (Predictive) | 0.068 | 0.243 | 0.168 | 0.730 | 0.971 |
| O1 (Orthogonal in X) | 0.387 | 0.473 | 0.346 |

LG – Low-grade; HG – high-grade; pT1 and pTa – high risk non-muscle invasive bladder cancer;

pT2 – muscle invasive bladder cancer; pT- the stage has been based on pathological or microscopic findings;

**
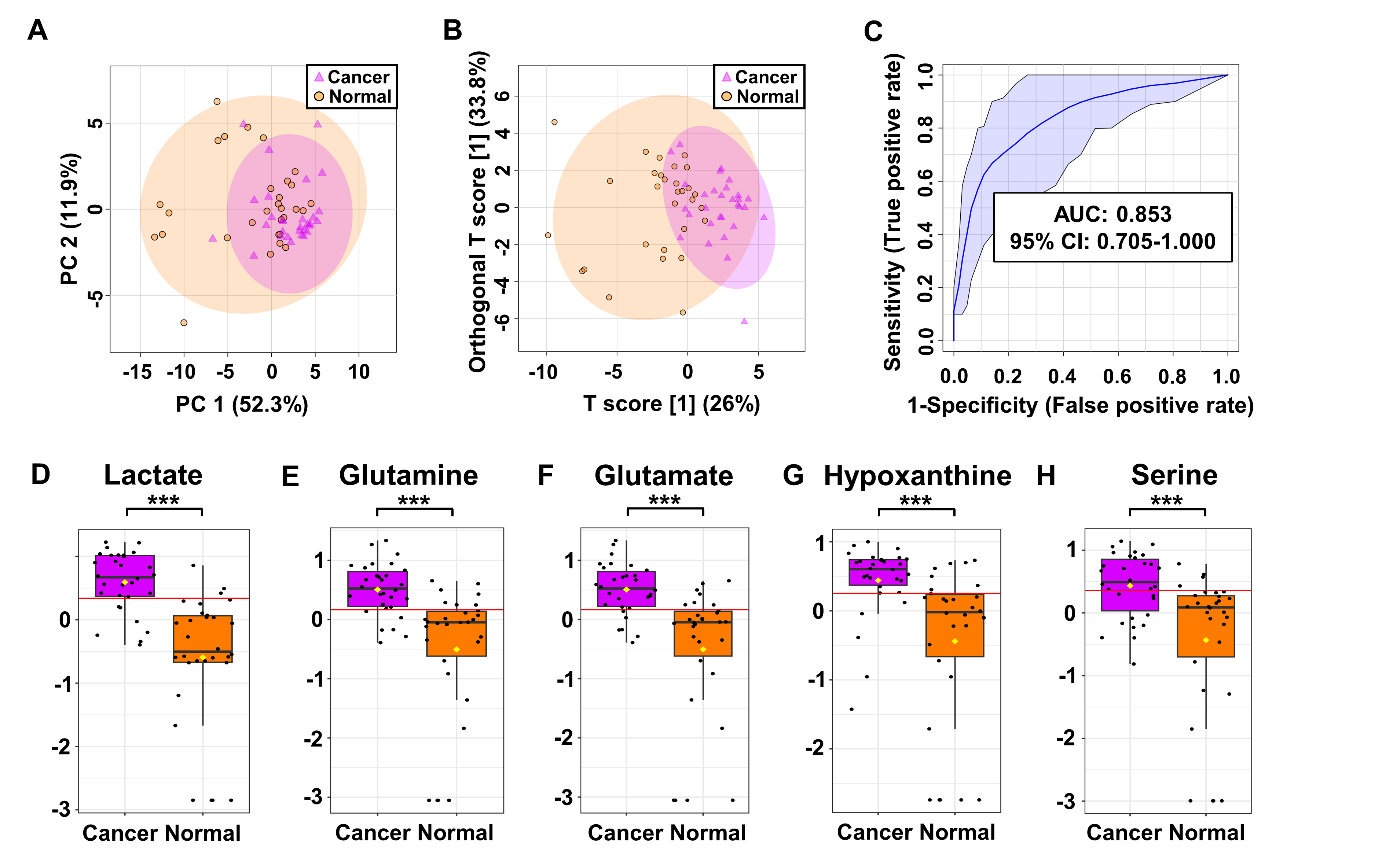
**

**Fig. S1.** Analysis of tissue metabolite profiles created for 1H NMR data for distinction of cancer and normal tissue from BC patients in the validation set. (A) 2D PCA and (B) OPLS-DA scores plots of the tumor (violet) and normal (orange) tissue samples. (C) ROC curves of the combination of six differential metabolites: lactate, glutamine, glutamate, hypoxanthine, serine and threonine (D-H) The box-whisker plots of selected metabolites. PC: principal component; ROC: the receiving operator characteristic; AUC: The Area Under the Curve.


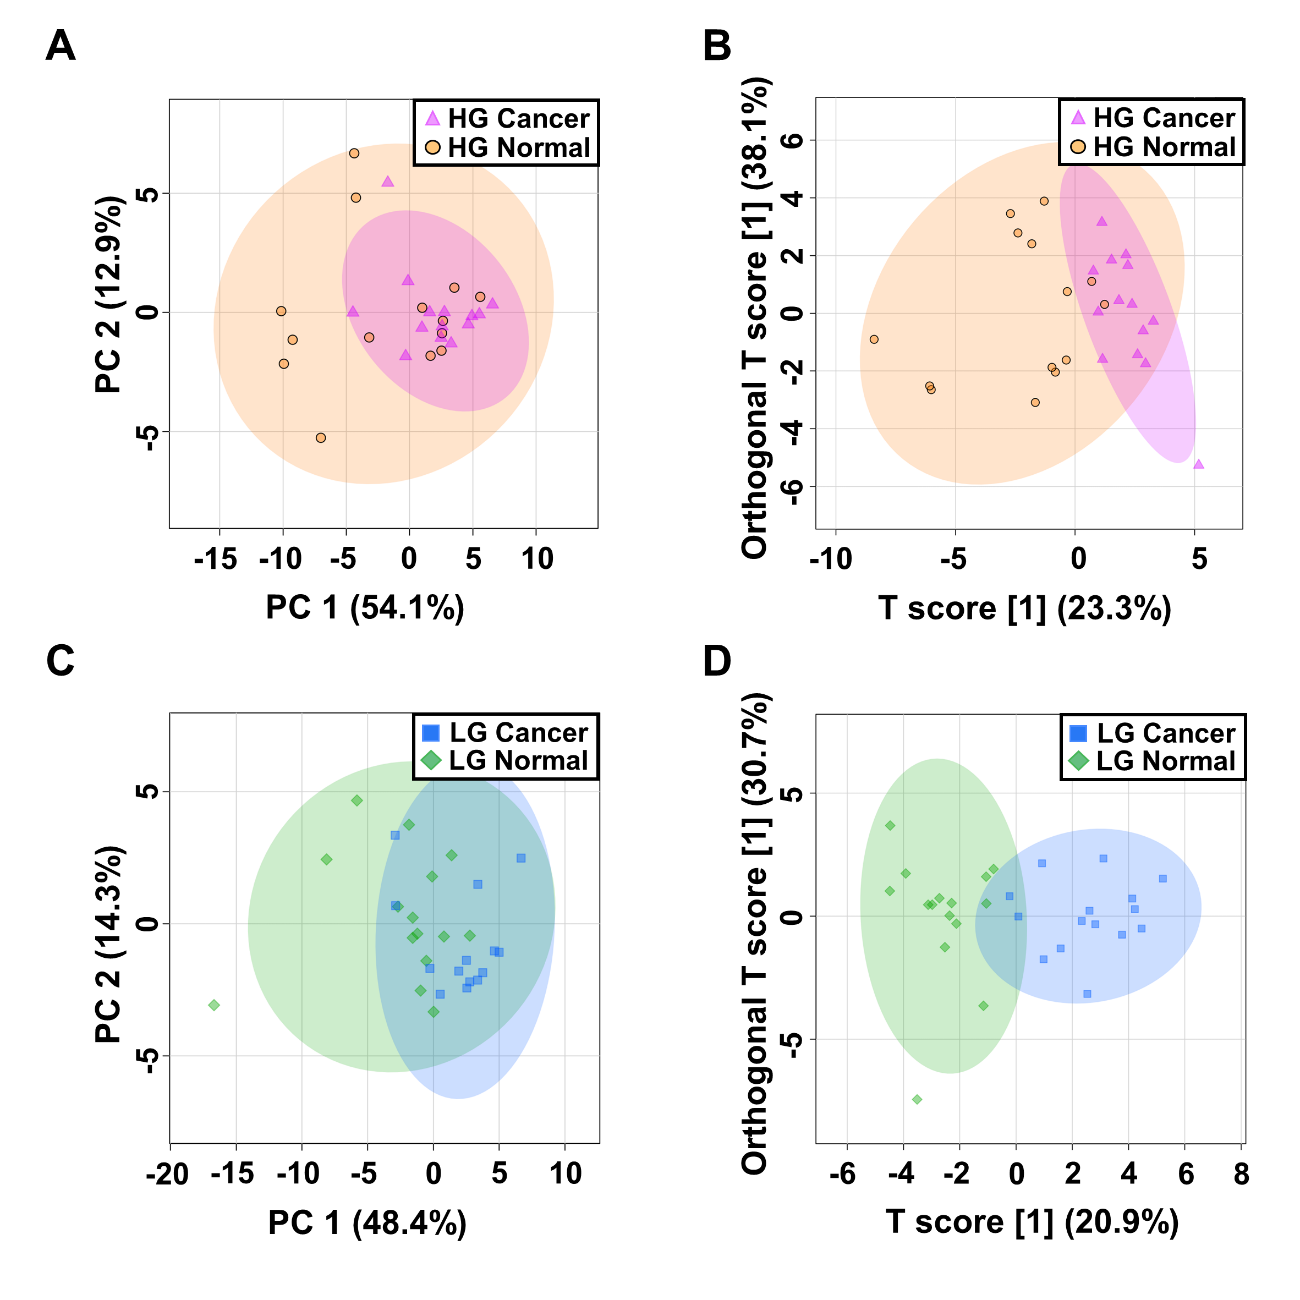


**Figure S2.** Analysis of tissue metabolite profiles created for 1H NMR data for distinction different grades of bladder cancer and normal tissue samples in validation set. (A) PCA and (B) OPLS-DA score plots of HG BC (violet) and HG normal (orange) tissue samples. (C) PCA and (D) OPLS-DA score plots of LG BC (blue) and LG normal (green) tissue samples.

**
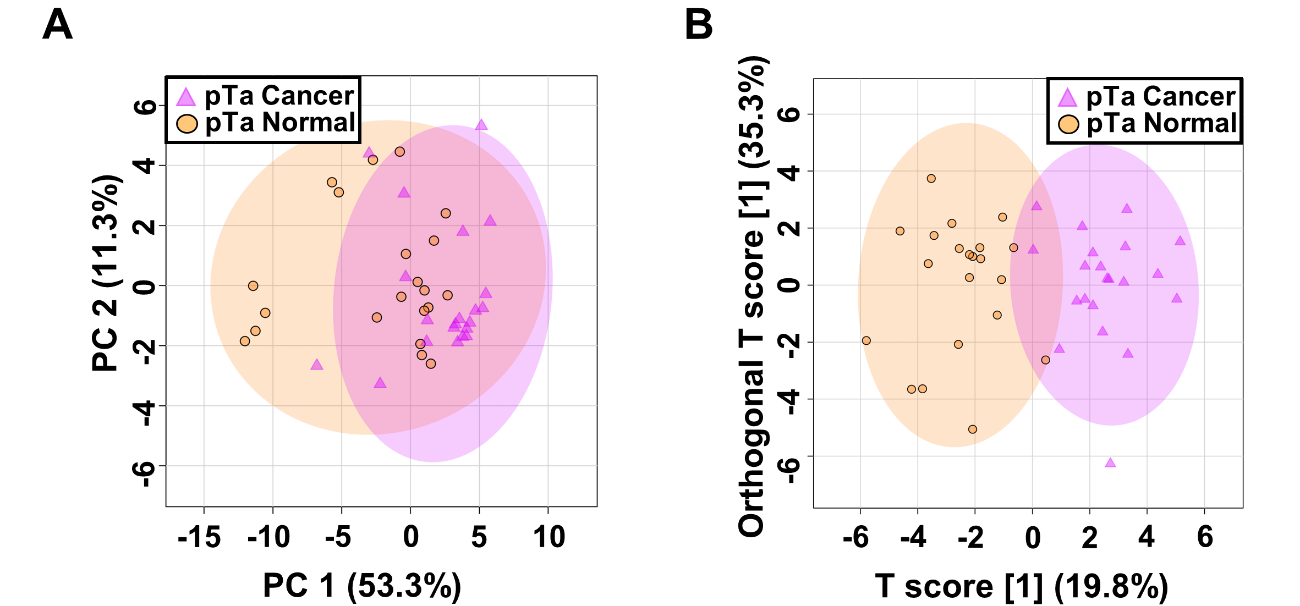
**

**Figure S3.** Analysis of tissue metabolite profiles created for 1H NMR data for distinction of pTa stage of bladder cancer and normal tissue samples in validation set. (A) 2D PCA and (B) OPLS-DA scores plot assessing the extent of separation between pTa BC (violet triangle) and pTa normal (orange circle).


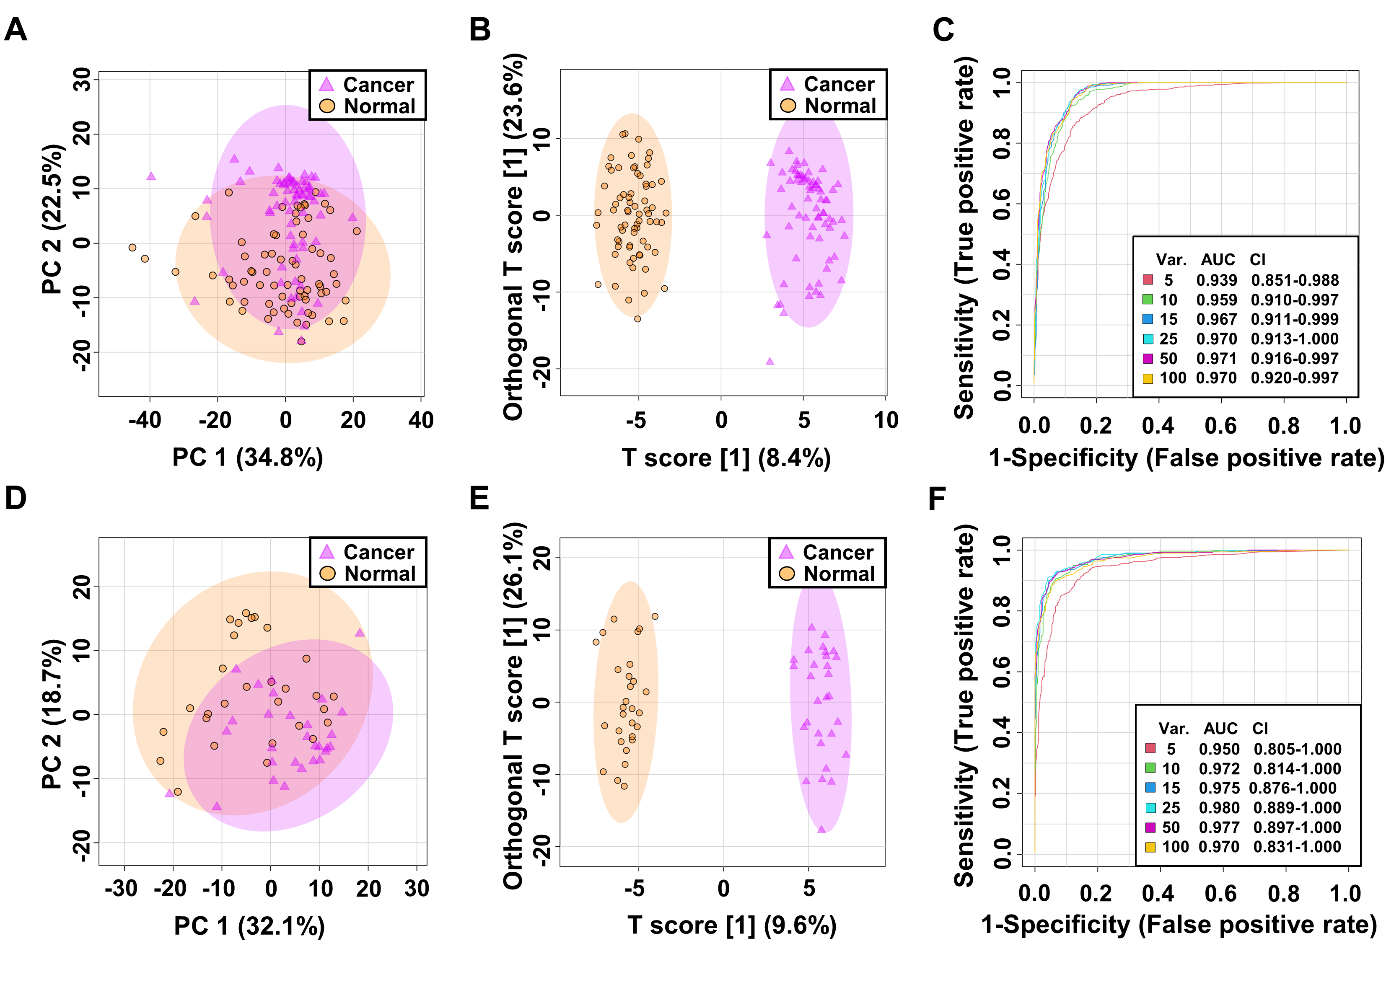


**Figure. S4.** Classification of bladder cancer and normal tissue samples using tissue metabolite profiles obtained from PFL-2D GS LASiS 109AgNPs LDI-MS data on polar tissue extracts (A) 2D PCA and (B) OPLS-DA scores plots of the tumor (violet) and normal (orange) tissue samples in the training set. (C) The receiving operator characteristic (ROC) curves in the cancer and normal tissue samples in the training set. (D) 2D PCA and (E) OPLS-DA scores plots of the tumor (violet) and normal (orange) tissue samples in the validation set. (C) The receiving operator characteristic (ROC) curves in the cancer and normal tissue samples in the validation set.


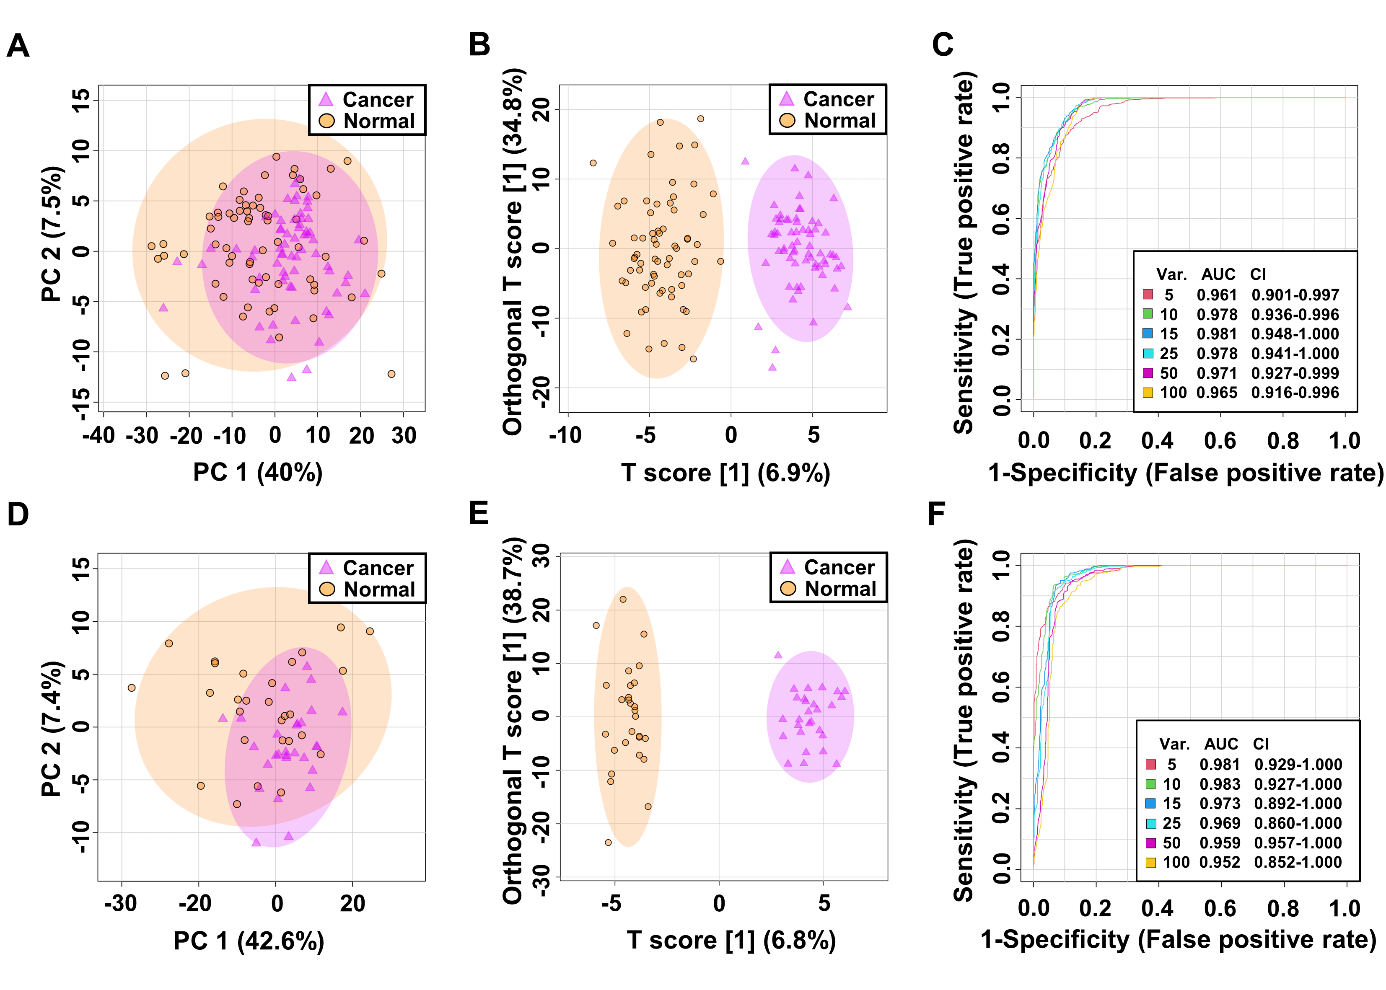


**Figure. S5.** Classification of bladder cancer and normal tissue samples using tissue metabolite profiles obtained from PFL-2D GS LASiS 109AgNPs LDI-MS data on non-polar tissue extracts. (A) 2D PCA and (B) OPLS-DA scores plots of the tumor (violet) and normal (orange) tissue samples in the training set. (C) The receiving operator characteristic (ROC) curves in the cancer and normal tissue samples in the training set. (D) 2D PCA and (E) OPLS-DA scores plots of the tumor (violet) and normal (orange) tissue samples in the validation set. (C) The receiving operator characteristic (ROC) curves in the cancer and normal tissue samples in the validation set.

**Table S5**. Summary of the subsets of potential biomarkers of bladder cancer from silver-109-based LDI-MS spectral analyses of tissue samples (*P*-value < 0.05; VIP > 1.0; AUC > 0.75). Identification is putative.

| **No.** | **Putatively annotated compounds** | ***m/z*c** | **Adduct type** | **Mass error [ppm]** | **VIP** | ***P*-valued** | **FCe** | **AUC** |
| --- | --- | --- | --- | --- | --- | --- | --- | --- |
| 1 | MG(18:3(2OMe,12Me)/0:0)a | 353.2580 | [C23H38+K]+ | -7.1 | 2.10 | 6.91E-13 | 0.122 | 0.852 |
| 2 | Trimethylaminea | 98.0364 | [C3H9N+K]+ | -2.7 | 2.05 | 7.41E-12 | 0.210 | 0.836 |
| 3 | D-Glucosea | 203.0524 | [C6H12O6+Na]+ | -1.3 | 1.91 | 2.94E-11 | 0.263 | 0.826 |
| 4 | Propanethiola | 184.9393 | [C3H8S+109Ag]+ | 2.1 | 1.91 | 1.13E-11 | 0.160 | 0.833 |
| 5 | Asp-Asp-Gly-Proa | 425.1273 | [C15H22N4O9+Na]+ | -1.5 | 1.76 | 1.29E-10 | 0.232 | 0.815 |
| 6 | alpha-Tocopheryloxyacetic acidb | 527.3479 | [C31H52O4+K]+ | -3.5 | 1.69 | 3.32E-07 | 0.399 | 0.758 |
| 7 | Trp-Val-Proa | 439.1737 | [C21H28N4O4+K]+ | -1.3 | 1.68 | 7.58E-10 | 0.215 | 0.801 |
| 8 | dTDP-6-Deoxy-L-mannosea | 656.9880 | [C16H26N2O15P2+109Ag]+ | 4.5 | 1.66 | 5.89E-10 | 0.228 | 0.803 |
| 9 | Ala-Asn-Asn-Asna | 454.1643 | [C15H25N7O8+Na]+ | -3.0 | 1.65 | 6.58E-09 | 0.311 | 0.784 |
| 10 | 2-oxo-4-methylthio-butanoic acida | 256.9242 | [C5H8O3S+109Ag]+ | 2.3 | 1.64 | 1.96E-08 | 2.530 | 0.775 |
| 11 | 3-phospho-hydroxypyruvateb | 219.9170 | [C3H2O7P+K]+ | -0.1 | 1.64 | 5.87E-08 | 0.161 | 0.774 |
| 12 | DG(PGF/14:0/0:0)b | 639.4814 | [C37H66O8+H]+ | -2.6 | 1.62 | 4.48E-07 | 0.228 | 0.755 |
| 13 | Ala-Gln-Ser-Tyra | 468.2084 | [C20H29N5O8+H]+ | -1.1 | 1.59 | 5.26E-09 | 0.239 | 0.786 |
| 14 | Nicotinuric acida | 288.9579 | [C8H8N2O3+109Ag]+ | 0.6 | 1.55 | 1.20E-07 | 0.396 | 0.759 |
| 15 | Cys-Met-Thr-Thra | 455.1632 | [C16H30N4O7S2+H]+ | 0.7 | 1.55 | 1.75E-08 | 0.305 | 0.776 |
| 16 | HETE di-endoperoxidea | 441.1869 | [C20H34O8+K]+ | -3.7 | 1.51 | 1.43E-08 | 0.272 | 0.778 |
| 17 | DG(16:0)a | 453.1571 | [C19H36O5+109Ag]+ | -7.5 | 1.49 | 8.15E-08 | 0.306 | 0.763 |
| 18 | Flavin mononucleotidea | 495.0695 | [C17H21N4O9P+K]+ | 3.5 | 1.49 | 5.26E-09 | 0.234 | 0.786 |
| 19 | Sulfocysteinea | 223.9642 | [C3H7NO5S2+Na]+ | -7.1 | 1.48 | 2.26E-07 | 0.421 | 0.754 |
| 20 | Epoxy-7-eicosynoic acida | 323.2578 | [C20H34O3+H]+ | -1.0 | 1.47 | 5.89E-08 | 0.384 | 0.766 |
| 21 | DG(PGF/0:0/10:0)b | 607.4156 | [C33H60O8+Na]+ | -4.0 | 1.45 | 3.31E-05 | 0.405 | 0.709 |
| 22 | Flavin mononucleotide hydroquinonea | 497.0828 | [C17H23N4O9P+K]+ | -1.3 | 1.45 | 9.76E-09 | 0.284 | 0.781 |
| 23 | 3-Methylguaninea | 273.9701 | [C6H7N5O+109Ag]+ | 3.1 | 1.43 | 5.34E-07 | 0.429 | 0.746 |
| 24 | 2,4-Dihydroxyacetophenone 5-sulfatea | 254.9942 | [C8H8O6S+Na]+ | 3.0 | 1.42 | 4.30E-07 | 0.411 | 0.748 |
| 25 | Phenol sulfatea | 175.0073 | [C6H6O4S+H]+ | 7.4 | 1.42 | 1.28E-06 | 0.398 | 0.737 |
| 26 | 2-oxo-8-methylthiooctanoatea | 312.9869 | [C9H16O3S+109Ag]+ | 2.2 | 1.41 | 1.39E-07 | 0.424 | 0.758 |
| 27 | Cys-Cys-Pro-Tyra | 523.1036 | [C20H28N4O6S2+K]+ | -8.8 | 1.39 | 2.80E-08 | 0.249 | 0.772 |
| 28 | 8-Hydroxy-7-methylguaninea | 289.9658 | [C6H7N5O2+109Ag]+ | 5.4 | 1.37 | 8.39E-07 | 0.455 | 0.741 |
| 29 | 5-hydroxy-2-oxo-4-ureido-2,5-dihydro-imidazole-5-carboxylatea | 239.9907 | [C5H5N4O5+K]+ | 3.9 | 1.33 | 4.88E-06 | 0.437 | 0.724 |
| 30 | Ribitola | 191.0326 | [C5H12O5+K]+ | 5.0 | 1.33 | 4.46E-06 | 0.430 | 0.725 |
| 31 | Ala-Thr-Gln-Proa | 524.1125 | [C17H29N5O7+109Ag]+ | 3.1 | 1.27 | 1.30E-07 | 0.263 | 0.759 |
| 32 | Ala-Asn-Gly-Arga | 525.1190 | [C15H28N8O6+109Ag]+ | 3.1 | 1.20 | 1.50E-06 | 0.305 | 0.736 |
| 33 | Hydroxyisocaproic acida | 240.9814 | [C6H12O3+109Ag]+ | -6.0 | 1.18 | 1.77E-05 | 0.453 | 0.710 |
| 34 | [GP] 1-acyl-sn-glycero-3-phosphatea | 237.9627 | [C4H8O7P+K]+ | -5.2 | 1.14 | 2.76E-05 | 0.469 | 0.705 |

aCompounds obtained from polar tissue extracts; bCompounds obtained from non-polar tissue extracts cExperimental monoisotopic mass; d*P*-value determined from Student’s t-test, efold change between tumor and control urine calculated from the abundance mean values for each group; AUC: area under the curve; FC: fold change; *m/z*: mass-to-charge ratio; PFL-2D GS LASiS AuNPs: laser desorption/ionization mass spectrometry (LDI-MS) with gold nanoparticles (AuNPs) produced by pulsed fiber laser (PFL) 2D galvoscanner (2D GS) laser synthesis in solution/suspension (LASiS) LDI-MS: PFL-2D GS LASiS 109AgNPs LDI-MS: laser desorption/ionization mass spectrometry (LDI-MS) with silver-109 nanoparticles (109AgNPs) produced by pulsed fiber laser (PFL) 2D galvoscanner (2D GS) laser synthesis in solution/suspension (LASiS); VIP: variable influence on projection

**Table S6.** Result from Pathway Analysis

| **No** | **KEGG pathway** | **Total**a | **Hits**b | **Impact**c | ***P-*value**d | | **Holm p**e | | **FDR**f | |
| --- | --- | --- | --- | --- | --- | --- | --- | --- | --- | --- |
| 1 | Aminoacyl-tRNA biosynthesis | 9 | 48 | 0.000 | 2.44E-10 | 2.05E-08 | | 2.05E-08 | |
| 2 | Alanine, aspartate and glutamate metabolism | 4 | 28 | 0.534 | 1.73E-04 | 1.44E-02 | | 7.26E-03 | |
| 3 | Arginine biosynthesis | 3 | 14 | 0.117 | 3.71E-04 | 3.04E-02 | | 1.04E-02 | |
| 4 | Phenylalanine, tyrosine and tryptophan biosynthesis | 2 | 4 | 1.000 | 6.71E-04 | 5.43E-02 | | 1.41E-02 | |
| 5 | Nitrogen metabolism | 2 | 6 | 0.000 | 1.66E-03 | 1.32E-01 | | 2.32E-02 | |
| 6 | D-Glutamine and D-glutamate metabolism | 2 | 6 | 0.500 | 1.66E-03 | 1.32E-01 | | 2.32E-02 | |
| 7 | Valine, leucine and isoleucine biosynthesis | 2 | 8 | 0.000 | 3.05E-03 | 2.38E-01 | | 3.66E-02 | |
| 8 | Phenylalanine metabolism | 2 | 10 | 0.357 | 4.84E-03 | 3.73E-01 | | 4.56E-02 | |
| 9 | Glycine, serine and threonine metabolism | 3 | 33 | 0.024 | 4.88E-03 | 3.73E-01 | | 4.56E-02 | |
| 10 | Glycerophospholipid metabolism | 3 | 36 | 0.071 | 6.26E-03 | 4.69E-01 | | 5.26E-02 | |
| 11 | Histidine metabolism | 2 | 16 | 0.000 | 1.24E-02 | 9.19E-01 | | 9.48E-02 | |
| 12 | Glycolysis / Gluconeogenesis | 2 | 26 | 0.000 | 3.15E-02 | 1.00E+00 | | 2.21E-01 | |
| 13 | Riboflavin metabolism | 1 | 4 | 0.500 | 4.32E-02 | 1.00E+00 | | 2.74E-01 | |
| 14 | Glyoxylate and dicarboxylate metabolism | 2 | 32 | 0.000 | 4.63E-02 | 1.00E+00 | | 2.74E-01 | |
| 15 | Cysteine and methionine metabolism | 2 | 33 | 0.105 | 4.90E-02 | 1.00E+00 | | 2.74E-01 | |
| 16 | Ubiquinone and other terpenoid-quinone biosynthesis | 1 | 9 | 0.000 | 9.47E-02 | 1.00E+00 | | 4.97E-01 | |
| 17 | Butanoate metabolism | 1 | 15 | 0.000 | 1.53E-01 | 1.00E+00 | | 6.82E-01 | |
| 18 | Nicotinate and nicotinamide metabolism | 1 | 15 | 0.000 | 1.53E-01 | 1.00E+00 | | 6.82E-01 | |
| 19 | Purine metabolism | 2 | 65 | 0.017 | 1.57E-01 | 1.00E+00 | | 6.82E-01 | |
| 20 | Glycerolipid metabolism | 1 | 16 | 0.105 | 1.62E-01 | 1.00E+00 | | 6.82E-01 | |
| 21 | Pantothenate and CoA biosynthesis | 1 | 19 | 0.000 | 1.90E-01 | 1.00E+00 | | 7.59E-01 | |
| 22 | Selenocompound metabolism | 1 | 20 | 0.000 | 1.99E-01 | 1.00E+00 | | 7.59E-01 | |
| 23 | beta-Alanine metabolism | 1 | 21 | 0.000 | 2.08E-01 | 1.00E+00 | | 7.59E-01 | |
| 24 | Pyruvate metabolism | 1 | 22 | 0.000 | 2.17E-01 | 1.00E+00 | | 7.59E-01 | |
| 25 | Glutathione metabolism | 1 | 28 | 0.020 | 2.68E-01 | 1.00E+00 | | 8.99E-01 | |
| 26 | Porphyrin and chlorophyll metabolism | 1 | 30 | 0.000 | 2.84E-01 | 1.00E+00 | | 9.17E-01 | |
| 27 | Arginine and proline metabolism | 1 | 38 | 0.086 | 3.46E-01 | 1.00E+00 | | 1.00E+00 | |
| 28 | Pyrimidine metabolism | 1 | 39 | 0.000 | 3.53E-01 | 1.00E+00 | | 1.00E+00 | |
| 29 | Valine, leucine and isoleucine degradation | 1 | 40 | 0.000 | 3.60E-01 | 1.00E+00 | | 1.00E+00 | |
| 30 | Tyrosine metabolism | 1 | 42 | 0.140 | 3.75E-01 | 1.00E+00 | | 1.00E+00 | |

aThe total number of compounds in the pathway; bthe hits is the actually matched number from the NMR and data; cthe pathway impact value calculated from pathway topology analysis; d*P-*value calculated from the enrichment analysis; e*P-*value adjusted by Holm–Bonferroni method; f*P-*value adjusted using False Discovery Rate; KEGG: Kyoto Encyclopedia of Genes and Genomes

**Table S7.** Result from Enrichment Pathway Analysis

| **No** | **SMPDB pathway** | **Total**a | **Hits**b | **Expected**c | ***P-*value**d | **Holm p**e | **FDR**f |
| --- | --- | --- | --- | --- | --- | --- | --- |
| 1 | Urea Cycle | 29 | 4 | 0.453 | 7.48E-04 | 7.33E-02 | 4.00E-02 |
| 2 | Glucose-Alanine Cycle | 13 | 3 | 0.203 | 8.15E-04 | 7.91E-02 | 4.00E-02 |
| 3 | Glycine and Serine Metabolism | 59 | 5 | 0.922 | 1.43E-03 | 1.38E-01 | 4.68E-02 |
| 4 | Glutamate Metabolism | 49 | 4 | 0.766 | 5.51E-03 | 5.24E-01 | 1.35E-01 |
| 5 | Phenylalanine and Tyrosine Metabolism | 28 | 3 | 0.438 | 8.09E-03 | 7.60E-01 | 1.35E-01 |
| 6 | Malate-Aspartate Shuttle | 10 | 2 | 0.156 | 9.58E-03 | 8.91E-01 | 1.35E-01 |
| 7 | Warburg Effect | 58 | 4 | 0.906 | 1.01E-02 | 9.31E-01 | 1.35E-01 |
| 8 | Ammonia Recycling | 32 | 3 | 0.500 | 1.18E-02 | 1.00E+00 | 1.35E-01 |
| 9 | Phosphatidylethanolamine Biosynthesis | 12 | 2 | 0.188 | 1.38E-02 | 1.00E+00 | 1.35E-01 |
| 10 | Beta-Alanine Metabolism | 34 | 3 | 0.531 | 1.39E-02 | 1.00E+00 | 1.35E-01 |
| 11 | Aspartate Metabolism | 35 | 3 | 0.547 | 1.51E-02 | 1.00E+00 | 1.35E-01 |
| 12 | Phosphatidylcholine Biosynthesis | 14 | 2 | 0.219 | 1.87E-02 | 1.00E+00 | 1.53E-01 |
| 13 | Purine Metabolism | 74 | 4 | 1.160 | 2.35E-02 | 1.00E+00 | 1.77E-01 |
| 14 | Alanine Metabolism | 17 | 2 | 0.266 | 2.72E-02 | 1.00E+00 | 1.90E-01 |
| 15 | Glutathione Metabolism | 21 | 2 | 0.328 | 4.04E-02 | 1.00E+00 | 2.48E-01 |
| 16 | Betaine Metabolism | 21 | 2 | 0.328 | 4.04E-02 | 1.00E+00 | 2.48E-01 |
| 17 | Arginine and Proline Metabolism | 53 | 3 | 0.828 | 4.55E-02 | 1.00E+00 | 2.62E-01 |
| 18 | Phospholipid Biosynthesis | 29 | 2 | 0.453 | 7.27E-02 | 1.00E+00 | 3.96E-01 |
| 19 | Amino Sugar Metabolism | 33 | 2 | 0.516 | 9.12E-02 | 1.00E+00 | 4.70E-01 |
| 20 | Tyrosine Metabolism | 72 | 3 | 1.120 | 9.64E-02 | 1.00E+00 | 4.71E-01 |
| 21 | Gluconeogenesis | 35 | 2 | 0.547 | 1.01E-01 | 1.00E+00 | 4.71E-01 |
| 22 | Nicotinate and Nicotinamide Metabolism | 37 | 2 | 0.578 | 1.11E-01 | 1.00E+00 | 4.94E-01 |
| 23 | Phenylacetate Metabolism | 9 | 1 | 0.141 | 1.33E-01 | 1.00E+00 | 5.42E-01 |
| 24 | Lactose Degradation | 9 | 1 | 0.141 | 1.33E-01 | 1.00E+00 | 5.42E-01 |
| 25 | Methionine Metabolism | 43 | 2 | 0.672 | 1.43E-01 | 1.00E+00 | 5.59E-01 |
| 26 | Thyroid hormone synthesis | 13 | 1 | 0.203 | 1.86E-01 | 1.00E+00 | 7.02E-01 |
| 27 | Pyrimidine Metabolism | 59 | 2 | 0.922 | 2.34E-01 | 1.00E+00 | 7.63E-01 |
| 28 | Valine, Leucine and Isoleucine Degradation | 60 | 2 | 0.938 | 2.40E-01 | 1.00E+00 | 7.63E-01 |
| 29 | Tryptophan Metabolism | 60 | 2 | 0.938 | 2.40E-01 | 1.00E+00 | 7.63E-01 |
| 30 | Spermidine and Spermine Biosynthesis | 18 | 1 | 0.281 | 2.49E-01 | 1.00E+00 | 7.63E-01 |
| 31 | Catecholamine Biosynthesis | 20 | 1 | 0.312 | 2.72E-01 | 1.00E+00 | 7.63E-01 |
| 32 | Vitamin B6 Metabolism | 20 | 1 | 0.312 | 2.72E-01 | 1.00E+00 | 7.63E-01 |
| 33 | Riboflavin Metabolism | 20 | 1 | 0.312 | 2.72E-01 | 1.00E+00 | 7.63E-01 |
| 34 | Lactose Synthesis | 20 | 1 | 0.312 | 2.72E-01 | 1.00E+00 | 7.63E-01 |
| 35 | Threonine and 2-Oxobutanoate Degradation | 20 | 1 | 0.312 | 2.72E-01 | 1.00E+00 | 7.63E-01 |
| 36 | Pantothenate and CoA Biosynthesis | 21 | 1 | 0.328 | 2.84E-01 | 1.00E+00 | 7.73E-01 |
| 37 | Transfer of Acetyl Groups into Mitochondria | 22 | 1 | 0.344 | 2.95E-01 | 1.00E+00 | 7.82E-01 |
| 38 | Glycolysis | 25 | 1 | 0.391 | 3.29E-01 | 1.00E+00 | 8.48E-01 |
| 39 | Cysteine Metabolism | 26 | 1 | 0.406 | 3.39E-01 | 1.00E+00 | 8.53E-01 |
| 40 | Selenoamino Acid Metabolism | 28 | 1 | 0.438 | 3.60E-01 | 1.00E+00 | 8.83E-01 |
| 41 | Folate Metabolism | 29 | 1 | 0.453 | 3.71E-01 | 1.00E+00 | 8.86E-01 |
| 42 | Lysine Degradation | 30 | 1 | 0.469 | 3.81E-01 | 1.00E+00 | 8.89E-01 |
| 43 | Galactose Metabolism | 38 | 1 | 0.594 | 4.56E-01 | 1.00E+00 | 1.00E+00 |
| 44 | Sphingolipid Metabolism | 40 | 1 | 0.625 | 4.74E-01 | 1.00E+00 | 1.00E+00 |
| 45 | Propanoate Metabolism | 42 | 1 | 0.656 | 4.91E-01 | 1.00E+00 | 1.00E+00 |
| 46 | Histidine Metabolism | 43 | 1 | 0.672 | 4.99E-01 | 1.00E+00 | 1.00E+00 |
| 47 | Pyruvate Metabolism | 48 | 1 | 0.750 | 5.39E-01 | 1.00E+00 | 1.00E+00 |
| 48 | Arachidonic Acid Metabolism | 69 | 1 | 1.080 | 6.75E-01 | 1.00E+00 | 1.00E+00 |

aThe total number of compounds in the pathway; bthe hits is the actually matched number from the NMR data; cthe pathway impact value calculated from pathway topology analysis; d*P-*value calculated from the enrichment analysis; e*P-*value adjusted by Holm–Bonferroni method; f*P-*value adjusted using False Discovery Rate; SMPDB: The Small Molecule Pathway Database
